# Supplementary material for: Proposal for a common nomenclature for fragment ions in mass spectra of lipids
Source: PLoS One. 2017 Nov 21;12(11):e0188394. doi: 10.1371/journal.pone.0188394 (PMC5697860; doi:10.1371/journal.pone.0188394)
Supplement: S1 Table — (XLSX) [file pone.0188394.s002.xlsx]

## Sheet: S1 Table
Lipid category	Lipid class	Lipid class number	Abbreviation	Example MS1	Example MS2	Note	Link
Fatty acyls	Acyl-Coenzyme A	1	ACoA	ACoA 18:1	ACoA 18:1
	Acylcarnitine	2	ACar	ACar 18:1	ACar 18:1		http://alex123.info/ALEX123/MS2.php?type=MS2.php&ms=ACar+18%3A2&mstol=0.0100&mswin=0.0000&mscharge=1&adduct=1&ms2=&ms2tol=0.0100&ms2win=0.0000&submit_name=Submit
	N-acylethanolamine	3	NAE	NAE 36:2
	Non-esterified fatty acid	4	NEFA	NEFA 18:1
Glycerolipids	Diacylglycerol	5	DAG	DAG 36:2	DAG 18:1-18:1
	Digalactosyldiacylglycerol	6	DGDG	DGDG 36:2
	Digalactosylmonoacylglycerol	7	DGMG	DGMG 36:2
	Ether diacylglycerol	8	DAG O-	DAG O- 36:2	DAG O-18:1/18:1
	Ether monoacylglycerol	9	MAG O-	MAG O-18:1
	Ether triacylglycerol	10	TAG O-	TAG O-54:3
	Monoacylglycerol	11	MAG	MAG 18:1
	Monogalactosyldiacylglycerol	12	MGDG	MGDG 36:2
	Monogalactosylmonoacylglycerol	13	MGMG	MGMG 36:2
	Sulfoquinovosyl diacylglycerol	14	SQDG	SQDG 36:2
	Sulfoquinovosyl monoacylglycerol	15	SQMG	SQMG 36:2
	Triacylglycerol	16	TAG	TAG 54:3	TAG 18:1-18:1-18:1
Glycerophospholipids	Bismonoacylglycerophosphate	17	BMP	BMP 36:2
	Cardiolipin	18	CL	CL 72:4	CL 18:1-18:1-18:1-18:1
	CDP-diacylglycerol	19	CDPDAG	CDPDAG 36:2
	Diacylglycerol pyrophosphate	20	DGPP	DGPP 36:2
	Dimethylphosphatidylethanolamine	21	DMPE	DMPE 36:2	DMPE 18:1-18:1
	Ether lysophophatidylcholine	22	LPC O-	LPC O-18:1	LPC O-18:1
	Ether lysophosphatidic acid	23	LPA O-	LPA O-18:1	LPA O-18:1
	Ether lysophosphatidylethanolamine	24	LPE O-	LPE O-18:1	LPE O-18:1
	Ether phosphatidic acid	25	PA O-	PA O-36:1	PA O-18:1/18:1
	Ether phosphatidylcholine	26	PC O-	PC O-36:2	PC O-18:1/18:1
	Ether phosphatidylethanolamine	27	PE O-	PE O-36:2	PE O-18:1/18:1
	Lyso-CDP-diacylglycerol	28	LCDPDAG	LCDPDAG 18:1	LCDPDAG 18:1
	Lysodimethylphosphatidylethanolamine	29	LDMPE	LDMPE 18:1	LDMPE 18:1
	Lysomonomethylphosphatidylethanolamine	30	LMMPE	LMMPE 18:1	LMMPE 18:1
	Lysophophatidylcholine	31	LPC	LPC 18:1	LPC 18:1
	Lysophosphatidic acid	32	LPA	LPA 18:1	LPA 18:1
	Lysophosphatidylethanolamine	33	LPE	LPE 18:1	LPE 18:1
	Lysophosphatidylglycerol	34	LPG	LPG 18:1	LPG 18:1
	Lysophosphatidylinositol	35	LPI	LPI 18:1	LPI 18:1	See Rovillos et al. RCMS 2016
	Lysophosphatidylinositol- mannosideinositolphosphate	36	LPIMIP	LPIMIP 18:1	LPIMIP 18:1	See Rovillos et al. RCMS 2016
	Lysophosphatidylinositol-glucosamine	37	LPIN	LPIN 18:1	LPIN 18:1	See Rovillos et al. RCMS 2016
	Lysophosphatidylinositolmannoside	38	LPIM	LPIM 18:1	LPIM 18:1	See Rovillos et al. RCMS 2016
	Lysophosphatidylserine	39	LPS	LPS 18:1	LPS 18:1
	Lysyl-phosphatidylglycerol	40	LysylPG	LysylPG 36:2
	Monolysocardiolipin	41	MLCL	MLCL 54:3
	Monomethylphosphatidylethanolamine	42	MMPE	MMPE 36:2	MMPE 18:1-18:1
	N-acylphosphatidylethanolamine	43	NAPE	NAPE 36:2
	Phosphatidic acid	44	PA	PA 36:2	PA 18:1-18:1
	Phosphatidylglycerol phosphate	45	PGP	PGP 36:2
	Phosphatidylcholine	46	PC	PC 36:2	PC 18:1-18:1
	Phosphatidylethanolamine	47	PE	PE 36:2	PE 18:1-18:1
	Phosphatidylglycerol	48	PG	PG 36:2	PG 18:1-18:1
	Phosphatidylinositol	49	PI	PI 36:2	PI 18:1-18:1
	Phosphatidylinositol mannoside	50	PIM	PIM 36:2	PIM 18:1-18:1	See Rovillos et al. RCMS 2016
	Phosphatidylinositol mannoside inositol phosphate	51	PIMIP	PIMIP 36:2	PIMIP 18:1-18:1	See Rovillos et al. RCMS 2016
	Phosphatidylinositol-glucosamine	52	PIN	PIN 36:2	PIN 18:1-18:1	See Rovillos et al. RCMS 2016
	Phosphatidylinositolbisphosphate	53	PIP2	PIP2 36:2
	Phosphatidylinositolphosphate	54	PIP	PIP 36:2
	Phosphatidylinositoltrisphosphate	55	PIP3	PIP3 36:2
	Phosphatidylserine	56	PS	PS 36:2	PS 18:1-18:1
	Ether phosphatidylcholine	57	PC O-	PC O-36:2	PC O-18:1/18:1
	Ether phosphatidylethanolamine	58a	PE O-	PE O-36:2	PE O-18:1/18:1
	Plasmanylphosphatidylethanolamine	58b	PE O-a	PE O-a 36:2	PE O-18:1a/18:1
	Plasmenylphosphatidylethanolamine	58c	PE O-p	PE O-p 36:2	PE O-18:1p/18:1
Prenol lipids	Dolichol	59	Dol-	Dol-80
	Dolichol phosphate	60	DolP-	DolP-80
	Dolichol phosphate hexose	61	DolPHex-	DolPHex-80
Sphingolipids	Ceramide phosphate	62	CerP	CerP 36:1;2
	Dihexosylceramide	63	Hex2Cer	Hex2Cer 36:2;2	Hex2Cer 18:1;2/18:1	This species corresponds to Lactosylceramide (Glc-Gal-Ceramide). We use the term dihexosylceramidehexosylceramide since MS cannot distiguish the sugar moieties attached to the ceramide bacbone.
	Ethanolaminephosphoceramide	64	EPC	EPC 36:1;2
	Ganglioside GD1	65	GD1	GD1 36:2;2
	Ganglioside GD2	66	GD2	GD2 36:2;2
	Ganglioside GD3	67	GD3	GD3 36:2;2
	Ganglioside GM1	68	GM1	GM1 36:2;2
	Ganglioside GM2	69	GM2	GM2 36:2;2
	Ganglioside GM3	70	GM3	GM3 36:2;2
	Ganglioside GT1	71	GT1	GT1 36:2;2
	Ganglioside GT2	72	GT2	GT2 36:2;2
	Ganglioside GT3	73	GT3	GT3 36:2;2
	Hexosylceramide	74	HexCer	HexCer 36:2;2	HexCer 18:1;2/18:1	Corresponds to monohexosylceramides glucosyl- (GlcCer) and galactosylceramide (GalCer). We use the term hexosylceramide since MS cannot distiguish the sugar moiety attached to the ceramide bacbone.
	Lysoinositolphosphoceramide	75	LIPC	LIPC 18:1;2
	Lysomonohexosylceramide	76	LHexCer	LHexCer 18:1;2
	Inositolphosphoceramide	77	IPC	IPC 36:1;2	IPC 18:0;3/26:0;1	See Ejsing et al. JMS 2006
	Long-chain base	78	LCB	LCB 18:1;2
	Long-chain base phosphate	79	LCBP	LCBP 18:1;2
	Lysosphingomyelin	80	LSM	LSM 18:1;2	LSM 18:1;2
	Mannosyldiinositolphosphoceramide	81	M(IP)2C	M(IP)2C 36:2;2	M(IP)2C 18:0;3/26:0;1	See Ejsing et al. JMS 2006
	Mannosylinositolphosphoceramide	82	MIPC	MIPC 36:2;2	MIPC 18:0;3/26:0;1	See Ejsing et al. JMS 2006
	Sphingomyelin	83	SM	SM 36:2;2	SM 18:1;2/18:1
	Sulfatide	84	SHexCer	SHexCer 36:2;2	SHexCer 18:1;2/18:1
	Trihexosylceramide	85	Hex3Cer	Hex3Cer 36:2;2	Hex3Cer 18:1;2/18:1
	Ceramide	86	Cer	Cer 36:1;2	Cer 18:1;2/18:0
	O-Acylceramide	87	ACer	ACer 48:2;2
Sterol lipids	Sterol (free)	88a	ST	ST 27:1	ST 27:1	The example 'ST 27:1' corresponds to cholesterol (trivial name)
	Cholesterol	88b	Cholesterol	Cholesterol	Cholesterol
	Steryl ester	89a	SE	SE 45:2	SE 27:1/18:1
	Cholesteryl ester	89b	CE	CE 18:1	CE 18:1	CE and SE are redundant. While we consider SE as the preferred way of naming steryl esters, including cholesteryl esters (CE), we have included CE as a separate class for those users who wish to consider only cholesterol
Isotope-labelled glycerophospholipids	Dimethylphosphatidylethanolamine (+[13]C2[15]N)	90	DMPE(+[13]C2[15]N)	DMPE 36:2(+[13]C2[15]N)	DMPE(+[13]C2[15]N) 18:1-18:1	Produced in yeast when incubated with [13]C3[15]N-serine
	Dimethylphosphatidylethanolamine (+[13]C2[15]N)	91	MMPE(+[13]C2[15]N)	MMPE 36:2(+[13]C2[15]N)	MMPE(+[13]C2[15]N) 18:1-18:1	Produced in yeast when incubated with [13]C3[15]N-serine
	Dimethylphosphatidylethanolamine (+[13]C2[2]H3[15]N)	92	MMPE(+[13]C2[2]H3[15]N)	MMPE 36:2(+[13]C2[2]H3[15]N)	MMPE(+[13]C2[2]H3[15]N) 18:1-18:1	Produced in yeast when incubated with [13]C3[15]N-serine and [2]H3-methionine
	Dimethylphosphatidylethanolamine (+[2]H3)	93	DMPE(+[2]H3)	DMPE 36:2(+[2]H3)	DMPE(+[2]H3) 18:1-18:1	Produced in yeast when incubated with [2]H3-methionine
	Dimethylphosphatidylethanolamine (+[2]H3)	94	MMPE(+[2]H3)	MMPE 36:2(+[2]H3)	MMPE(+[2]H3) 18:1-18:1	Produced in yeast when incubated with [2]H3-methionine
	Dimethylphosphatidylethanolamine (+[2]H6)	95	DMPE(+[2]H6)	DMPE 36:2(+[2]H6)	DMPE(+[2]H6) 18:1-18:1	Produced in yeast when incubated with [2]H3-methionine
	Lysophosphatidylcholine (+[2]H13)	96	LPC(+[2]H13)	LPC 18:1(+[2]H13)	LPC(+[2]H13) 18:1	Produced in yeast when incubated with [2]H13-choline
	Lysophosphatidylcholine (+[2]H3)	97	LPC(+[2]H3)	LPC 18:1(+[2]H3)	LPC(+[2]H3) 18:1	Produced in yeast when incubated with [2]H3-methionine
	Lysophosphatidylcholine (+[2]H6)	98	LPC(+[2]H6)	LPC 18:1(+[2]H6)	LPC(+[2]H6) 18:1	Produced in yeast when incubated with [2]H3-methionine
	Lysophosphatidylcholine (+[2]H9)	99	LPC(+[2]H9)	LPC 18:1(+[2]H9)	LPC(+[2]H9) 18:1	Produced in yeast when incubated with [2]H3-methionine
	Lysophosphatidylethanolamine (+[13]C2[15]N)	100	LPE(+[13]C2[15]N)	LPE 18:1(+[13]C2[15]N)	LPE(+[13]C2[15]N) 18:1	Produced in yeast when incubated with [13]C3[15]N-serine
	Lysophosphatidylinositol (+[2]H6)	101	LPI(+[2]H6)	LPI 18:1(+[2]H6)	LPI(+[2]H6) 18:1	Produced in yeast when incubated with [2]H6-inositol
	Lysophosphatidylserine (+[13]C3[15]N)	102	LPS(+[13]C3[15]N)	LPS 18:1(+[13]C3[15]N)	LPS(+[13]C3[15]N) 18:1	Produced in yeast when incubated with [13]C3[15]N-serine
	Phosphatidylcholine (+[2]H13)	103	PC(+[2]H13)	PC 36:2(+[2]H13)	PC(+[2]H13) 18:1-18:1	Produced in yeast when incubated with [2]H13-choline
	Phosphatidylcholine (+[2]H3)	104	PC(+[2]H3)	PC 36:2(+[2]H3)	PC(+[2]H3) 18:1-18:1	Produced in yeast when incubated with [2]H3-methionine
	Phosphatidylcholine (+[2]H6)	105	PC(+[2]H6)	PC 36:2(+[2]H6)	PC(+[2]H6) 18:1-18:1	Produced in yeast when incubated with [2]H3-methionine
	Phosphatidylcholine (+[2]H6)	106	PC(+[2]H6)	PC 36:2(+[2]H6)	PC 18:1(+[2]H3)-18:1(+[2]H3)	Produced in yeast when incubated with [2]H3-palmitate
	Phosphatidylcholine (+[2]H9)	107	PC(+[2]H9)	PC 36:2(+[2]H9)	PC(+[2]H9) 18:1-18:1	Produced in yeast when incubated with [2]H3-methionine
	Phosphatidylethanolamine (+[13]C2[15]N)	108	PE(+[13]C2[15]N)	PE 36:2(+[13]C2[15]N)	PE(+[13]C2[15]N) 18:1-18:1	Produced in yeast when incubated with [13]C3[15]N-serine
	Phosphatidylinositol (+[2]H6)	109	PI(+[2]H6)	PI 36:2(+[2]H6)	PI(+[2]H6) 18:1-18:1	Produced in yeast when incubated with [2]H6-inositol
	Phosphatidylserine (+[13]C3[15]N)	110	PS(+[13]C3[15]N)	PS 36:2(+[13]C3[15]N)	PS(+[13]C3[15]N) 18:1-18:1	Produced in yeast when incubated with [13]C3[15]N-serine
Isotope-labelled sphingolipids	Ceramide (+[13]C2[15]N)	111	Cer(+[13]C2[15]N)	Cer 36:2(+[13]C2[15]N)	Cer 18:1;2(+[13]2[15]N)/18:1	Produced in yeast when incubated with [13]C3[15]N-serine
	Inositolphosphoceramide (+[2]H6)	112	IPC(+[2]H6)	IPC 36:2;2(+[2]H6)	IPC(+[2]H6) 18:0;3/26:0;1	Produced in yeast when incubated with [2]H6-inositol
	Long-chain base (+[13]C2[15]N)	113	LCB(+[13]C2[15]N)	LCB 18:1;2(+[13]C2[15]N)		Produced in yeast when incubated with [13]C3[15]N-serine
	Mannosyldiinositolphosphoceramide (+[2]H12)	114	M(IP)2C(+[2]H12)	M(IP)2C 36:2;2(+[2]H12)	M(IP)2C(+[2]H12) 18:0;3/26:0;1	Produced in yeast when incubated with [2]H6-inositol
	Mannosyldiinositolphosphoceramide (+[2]H6)	115	M(IP)2C(+[2]H6)	M(IP)2C 36:2;2(+[2]H6)	M(IP)2C(+[2]H6) 18:0;3/26:0;1	Produced in yeast when incubated with [2]H6-inositol
	Mannosylinositolphosphoceramide (+[2]H6)	116	MIPC(+[2]H6)	MIPC 36:2;2(+[2]H6)	MIPC(+[2]H6) 18:0;3/26:0;1	Produced in yeast when incubated with [2]H6-inositol
Isotope-labelled sterol lipids	Sterol (+[2H]2)	117	ST(+[2]H2)	ST 27:1(+[2]H2)	ST 27:1(+[2]H2)	Produced in yeast when incubated with [2]H3-methionine
	Steryl ester (+[2H]2)	118	SE(+[2]H2)	SE 45:2(+[2]H2)	SE 27:1/18:1(+[2]H2)	Produced in yeast when incubated with [2]H3-methionine
