# Supplementary material for: Proposal for a common nomenclature for fragment ions in mass spectra of lipids
Source: PLOS journal article supplement (doi:10.1371/journal.pone.0188394), 2017-11-21
Supplement: S3 (10.1371/journal.pone.0188394.s003) [file journal.pone.0188394.s003]

**S1 Fig**

| HCA                 | Structure                                                                            | Annotation |
|---------------------|--------------------------------------------------------------------------------------|------------|
| Fatty acyl          | 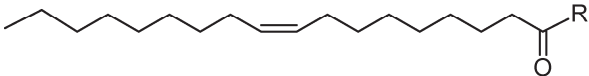   | FA 18:1    |
| Alkanol             |    | O-18:1     |
| Long-chain base     |    | LCB 18:1;2 |
| Sterol              |    | ST 27:1    |
| Diacylglycerol      |    | DAG 36:2   |
| Ceramide            |   | Cer 36:1;2 |
| Monolysocardiolipin |  | MLCL 54:3  |

**S1 Fig. Examples of minimal HCAs (hydrocarbon chain-based attributes) used for annotating neutral and charged fragment structures.** As described in the text, fragment structures containing HCAs are referenced by using the annotation of HCAs followed by chemical modifications in parentheses (e.g. “FA 18:1(+O)” denotes an acyl carboxylate anion). To eliminate possible inconsistencies due to differences in polarity, charge states and adducts, all fragment structures are annotated relative to neutral HCAs.
